# Supplementary material
Source: MDPI journal article supplement (https://www.mdpi.com/2075-163X/13/11/1457)
Supplement: s1 [file s1]

Table S1. List of samples information.

| No. | Sample label | Lithology                                                       | Latitude     | Longitude     | Remarks          |
|-----|--------------|-----------------------------------------------------------------|--------------|---------------|------------------|
| 1   | YF-1         | Medium- to coarse-grained biotite porphyritic monzonite granite | 26°18'38.2"N | 115°11'13.1"E | Yongfeng granite |
| 2   | YF-2         | Medium- to coarse-grained biotite porphyritic monzonite granite | 26°18'38.2"N | 115°11'13.1"E |                  |
| 3   | XGml-1       | Medium- to coarse-grained biotite porphyritic monzonite granite | 26°17'14.7"N | 115°15'27.7"E |                  |
| 4   | XGls-12      | Medium- to coarse-grained biotite porphyritic monzonite granite | 26°14'59.8"N | 115°16'26.5"E |                  |
| 5   | XGyf-1       | Fine-grained biotite monzonite granite                          | 26°19'55"N   | 115°11'19.6"E | Longshi granite  |

Table S2 Results of trace elements in zircons from samples YF-1 and YF-2 (ppm)

| No.    | Ti    | Rb   | Sr   | Y       | Zr     | Nb   | La   | Ce    | Pr   | Nd    | Sm    | Eu   | Gd    | Tb    | Dy     | Ho    | Er     | Tm    | Yb     |
|--------|-------|------|------|---------|--------|------|------|-------|------|-------|-------|------|-------|-------|--------|-------|--------|-------|--------|
| YF-1-1 | 4.75  | 0.40 | 0.04 | 1213.61 | 480178 | 1.91 | 0.02 | 18.01 | 0.22 | 3.79  | 7.14  | 1.23 | 33.62 | 10.51 | 118.91 | 42.61 | 181.62 | 37.35 | 337.61 |
| YF-1-2 | 4.80  | 0.40 | 0.24 | 2315.87 | 457369 | 3.72 | 0.14 | 65.16 | 0.71 | 11.54 | 18.08 | 6.56 | 73.22 | 21.51 | 223.66 | 78.32 | 336.54 | 69.81 | 648.51 |
| YF-1-3 | 14.71 | 0.72 | 0.19 | 1573.73 | 471494 | 4.70 | 0.19 | 22.80 | 0.19 | 2.85  | 6.69  | 0.80 | 36.69 | 12.64 | 144.96 | 56.21 | 242.66 | 47.92 | 424.80 |
| YF-1-4 | 4.47  | 1.72 | 0.24 | 2147.01 | 394758 | 3.13 | 0.19 | 15.31 | 0.20 | 4.19  | 10.52 | 0.76 | 59.61 | 20.25 | 215.47 | 77.60 | 327.02 | 65.76 | 584.91 |
| YF-1-5 | 5.83  | 0.00 | 0.05 | 1285.46 | 431521 | 1.54 | 0.01 | 9.75  | 0.19 | 3.54  | 6.84  | 0.91 | 32.03 | 10.68 | 125.51 | 45.84 | 197.62 | 39.43 | 348.96 |
| YF-1-6 | 12.22 | 0.00 | 0.00 | 1001.40 | 491423 | 2.53 | 0.02 | 19.04 | 0.09 | 1.64  | 4.76  | 0.71 | 24.83 | 7.87  | 91.97  | 35.64 | 151.63 | 32.08 | 283.89 |
| YF-1-7 | 4.73  | 0.05 | 0.12 | 759.64  | 506124 | 1.53 | 0.00 | 9.45  | 0.04 | 0.95  | 2.13  | 0.13 | 13.67 | 4.58  | 56.31  | 23.98 | 118.38 | 27.28 | 283.30 |
| YF-1-8 | 4.87  | 0.65 | 0.26 | 1000.14 | 540187 | 2.27 | 0.01 | 4.47  | 0.03 | 0.66  | 1.28  | 0.07 | 13.19 | 5.66  | 77.50  | 31.28 | 146.81 | 34.01 | 347.08 |
| YF-1-9 | 5.55  | 0.22 | 0.09 | 1378.62 | 480828 | 2.63 | 0.00 | 4.46  | 0.03 | 0.81  | 3.42  | 0.14 | 24.86 | 9.33  | 117.83 | 47.57 | 210.31 | 43.92 | 407.29 |

|         |       |      |      |         |        |       |       |       |      |       |       |      |       |       |        |       |        |       |        |
|---------|-------|------|------|---------|--------|-------|-------|-------|------|-------|-------|------|-------|-------|--------|-------|--------|-------|--------|
| YF-1-10 | 6.09  | 0.00 | 0.03 | 1018.12 | 473652 | 2.85  | 0.01  | 19.79 | 0.08 | 1.68  | 4.23  | 0.38 | 23.61 | 7.82  | 92.89  | 35.24 | 153.36 | 31.77 | 292.73 |
| YF-1-11 | 13.65 | 0.16 | 0.15 | 1041.57 | 407583 | 1.61  | 0.10  | 5.17  | 0.14 | 2.00  | 3.40  | 0.23 | 22.47 | 8.28  | 96.55  | 36.63 | 163.99 | 33.21 | 310.68 |
| YF-1-12 | 7.10  | 0.06 | 1.09 | 1427.91 | 401773 | 2.50  | 4.26  | 17.14 | 1.63 | 9.49  | 7.15  | 0.20 | 32.40 | 10.94 | 127.94 | 49.13 | 220.34 | 45.90 | 416.72 |
| YF-1-13 | 14.40 | 0.00 | 0.13 | 730.26  | 375409 | 1.43  | 0.01  | 7.07  | 0.08 | 2.07  | 4.04  | 0.49 | 20.07 | 6.39  | 74.21  | 26.15 | 114.50 | 22.46 | 201.38 |
| YF-1-14 | 3.92  | 0.25 | 0.16 | 850.39  | 440386 | 3.11  | 0.05  | 13.49 | 0.05 | 0.71  | 1.72  | 0.11 | 15.60 | 5.71  | 70.09  | 28.32 | 129.66 | 27.80 | 264.16 |
| YF-1-15 | 8.43  | 0.19 | 0.13 | 1473.68 | 379629 | 2.25  | 0.02  | 19.96 | 0.23 | 3.73  | 7.83  | 0.78 | 38.11 | 12.42 | 143.97 | 52.23 | 222.22 | 44.22 | 379.52 |
| YF-1-16 | 1.52  | 0.26 | 0.09 | 2070.85 | 446161 | 23.32 | 0.01  | 14.11 | 0.01 | 0.43  | 1.76  | 1.19 | 20.22 | 9.40  | 139.92 | 61.80 | 322.23 | 77.19 | 767.09 |
| YF-1-17 | 13.03 | 0.12 | 0.13 | 1739.12 | 420987 | 1.61  | 0.02  | 7.36  | 0.30 | 4.31  | 8.04  | 0.45 | 41.73 | 14.71 | 164.30 | 59.46 | 250.72 | 48.40 | 409.81 |
| YF-1-18 | 8.80  | 0.11 | 0.03 | 964.84  | 382885 | 2.28  | 0.01  | 10.61 | 0.12 | 1.94  | 4.61  | 0.32 | 23.02 | 7.69  | 90.76  | 33.61 | 145.76 | 29.57 | 262.71 |
| YF-1-19 | 7.70  | 0.14 | 0.35 | 974.25  | 353810 | 3.59  | 2.64  | 29.46 | 1.05 | 6.01  | 4.97  | 0.38 | 22.30 | 7.46  | 91.41  | 34.50 | 152.10 | 31.50 | 285.22 |
| YF-1-20 | 2.82  | 0.00 | 0.45 | 1217.68 | 345458 | 2.83  | 3.26  | 16.08 | 1.41 | 7.73  | 5.86  | 0.29 | 27.32 | 9.30  | 115.60 | 41.05 | 172.33 | 35.44 | 298.28 |
| YF-2-1  | 14.88 | 4.80 | 0.48 | 1850.38 | 435870 | 2.45  | 0.20  | 6.83  | 0.31 | 5.31  | 8.41  | 0.47 | 47.79 | 15.61 | 176.76 | 63.54 | 270.49 | 52.41 | 468.96 |
| YF-2-2  | 26.58 | 0.01 | 0.11 | 1733.94 | 481311 | 1.28  | 0.07  | 8.46  | 0.57 | 7.59  | 14.17 | 1.36 | 53.13 | 16.68 | 176.14 | 61.16 | 240.94 | 46.23 | 394.39 |
| YF-2-3  | 19.32 | 0.00 | 0.16 | 1520.83 | 508867 | 0.99  | 0.06  | 7.95  | 0.40 | 7.47  | 11.30 | 1.44 | 45.48 | 13.95 | 151.84 | 51.58 | 207.21 | 40.46 | 344.31 |
| YF-2-4  | 5.70  | 0.06 | 0.06 | 2153.60 | 466136 | 1.63  | 0.02  | 2.49  | 0.19 | 3.81  | 8.42  | 0.29 | 49.77 | 16.60 | 196.46 | 73.57 | 316.91 | 63.47 | 557.73 |
| YF-2-5  | 17.34 | 1.13 | 0.64 | 1512.54 | 520941 | 2.45  | 1.57  | 11.44 | 0.94 | 8.88  | 11.85 | 0.79 | 53.82 | 15.39 | 152.80 | 50.73 | 202.45 | 39.75 | 356.28 |
| YF-2-6  | 6.59  | 0.08 | 0.19 | 1088.56 | 430757 | 1.72  | 0.00  | 6.16  | 0.05 | 2.27  | 3.66  | 0.44 | 22.67 | 7.97  | 98.32  | 38.40 | 169.61 | 36.10 | 341.47 |
| YF-2-7  | 7.99  | 0.73 | 0.14 | 1574.25 | 489119 | 2.06  | 0.00  | 3.26  | 0.11 | 1.46  | 4.74  | 0.14 | 31.35 | 11.86 | 144.89 | 52.42 | 225.06 | 46.23 | 414.18 |
| YF-2-8  | 9.88  | 5.74 | 0.00 | 1312.84 | 503079 | 2.06  | 0.97  | 17.68 | 0.32 | 4.02  | 6.78  | 1.09 | 33.36 | 10.44 | 125.78 | 44.85 | 196.41 | 39.78 | 361.86 |
| YF-2-9  | 4.28  | 0.65 | 0.66 | 739.03  | 456151 | 1.69  | 0.08  | 5.59  | 0.09 | 1.09  | 2.59  | 0.47 | 17.58 | 5.97  | 70.15  | 25.59 | 113.01 | 22.90 | 203.97 |
| YF-2-10 | 5.52  | 1.11 | 2.44 | 1021.60 | 482669 | 3.28  | 21.76 | 89.23 | #### | 71.59 | 37.42 | 1.41 | 60.92 | 15.25 | 125.03 | 37.14 | 145.60 | 29.14 | 266.34 |
| YF-2-11 | 10.41 | 0.24 | 0.23 | 2147.19 | 510355 | 2.44  | 0.79  | 7.19  | 0.49 | 6.62  | 10.91 | 0.34 | 58.60 | 17.95 | 208.89 | 74.72 | 316.29 | 62.89 | 558.55 |
| YF-2-12 | 4.37  | 0.00 | 0.06 | 802.50  | 505207 | 2.06  | 0.01  | 10.12 | 0.09 | 1.26  | 3.03  | 0.25 | 17.31 | 6.18  | 72.59  | 27.93 | 120.46 | 24.71 | 229.96 |
| YF-2-13 | 4.25  | 0.00 | 0.08 | 1956.94 | 474831 | 4.47  | 0.28  | 10.41 | 0.34 | 3.02  | 5.85  | 0.32 | 34.81 | 13.12 | 166.58 | 65.86 | 304.84 | 68.71 | 637.86 |
| YF-2-14 | 7.60  | 0.22 | 0.00 | 781.35  | 518568 | 2.71  | 0.00  | 15.76 | 0.06 | 1.11  | 2.72  | 0.52 | 16.83 | 5.82  | 69.26  | 26.09 | 118.68 | 24.96 | 227.65 |
| YF-2-15 | 8.57  | 0.46 | 0.14 | 2124.94 | 479316 | 3.31  | 0.16  | 17.37 | 0.85 | 12.98 | 18.19 | 5.40 | 80.04 | 23.37 | 229.61 | 76.33 | 297.60 | 56.85 | 487.62 |

|         |       |      |      |         |        |      |      |       |      |       |      |      |       |       |        |       |        |       |        |
|---------|-------|------|------|---------|--------|------|------|-------|------|-------|------|------|-------|-------|--------|-------|--------|-------|--------|
| YF-2-16 | 12.78 | 0.44 | 0.15 | 867.69  | 480925 | 2.90 | 3.27 | 16.63 | 1.50 | 8.12  | 6.31 | 0.32 | 23.93 | 7.68  | 83.99  | 29.50 | 125.18 | 27.60 | 269.00 |
| YF-2-17 | 5.17  | 0.19 | 0.79 | 1178.25 | 458681 | 3.90 | 7.60 | 39.08 | 2.34 | 13.35 | 7.03 | 0.46 | 28.93 | 8.94  | 110.34 | 40.06 | 178.61 | 37.34 | 334.99 |
| YF-2-18 | 13.95 | 0.00 | 0.03 | 937.67  | 378596 | 1.62 | 0.03 | 5.61  | 0.13 | 2.96  | 5.07 | 0.37 | 25.72 | 8.18  | 96.27  | 34.50 | 143.83 | 28.65 | 264.15 |
| YF-2-19 | 8.97  | 0.06 | 1.13 | 1274.23 | 436336 | 2.96 | 7.22 | 31.37 | 2.78 | 14.55 | 7.52 | 0.48 | 30.56 | 10.03 | 122.82 | 43.48 | 194.66 | 41.08 | 375.73 |
| YF-2-20 | 12.76 | 0.02 | 0.19 | 2041.48 | 432381 | 3.75 | 0.33 | 9.85  | 0.27 | 2.54  | 6.80 | 0.27 | 40.21 | 14.53 | 186.85 | 71.67 | 323.29 | 66.59 | 592.42 |
| YF-2-21 | 5.68  | 0.00 | 0.30 | 1493.11 | 409103 | 3.54 | 0.79 | 10.78 | 0.53 | 4.61  | 5.59 | 0.25 | 31.57 | 11.32 | 140.61 | 52.36 | 231.48 | 49.04 | 454.83 |

(continued)

| No.     | Lu     | Hf       | Ta    | Pb     | Th     | U       | ΣREE    | LREE   | HREE    | LREE/HREE | Eu/Eu* | Ce/Ce* | T <sub>ri</sub> (°C) | Ce <sup>4+</sup> /Ce <sup>3+</sup> | lgf(O <sub>2</sub> ) | ΔFMQ  |
|---------|--------|----------|-------|--------|--------|---------|---------|--------|---------|-----------|--------|--------|----------------------|------------------------------------|----------------------|-------|
| YF-1-1  | 65.70  | 10967.72 | 1.12  | 5.88   | 146.61 | 201.87  | 858.35  | 30.42  | 827.93  | 0.04      | 0.24   | 67.45  | 724                  | 18.18                              | -18.10               | -2.03 |
| YF-1-2  | 125.88 | 9979.08  | 1.27  | 14.54  | 666.90 | 400.37  | 1679.63 | 102.18 | 1577.45 | 0.06      | 0.55   | 51.49  | 725                  | 20.01                              | -17.72               | -1.67 |
| YF-1-3  | 80.18  | 9702.62  | 1.83  | 44.57  | 474.87 | 528.76  | 1079.59 | 33.53  | 1046.06 | 0.03      | 0.16   | 29.19  | 838                  | 33.80                              | -10.54               | 2.98  |
| YF-1-4  | 112.54 | 9367.73  | 2.12  | 25.10  | 499.95 | 920.80  | 1494.34 | 31.17  | 1463.17 | 0.02      | 0.09   | 19.26  | 719                  | 13.07                              | -19.55               | -3.34 |
| YF-1-5  | 65.51  | 9376.00  | 0.86  | 6.57   | 163.68 | 232.39  | 886.82  | 21.24  | 865.58  | 0.02      | 0.19   | 51.91  | 743                  | 10.51                              | -19.06               | -3.45 |
| YF-1-6  | 53.70  | 10810.69 | 1.39  | 8.42   | 192.00 | 296.07  | 707.87  | 26.26  | 681.61  | 0.04      | 0.20   | 109.93 | 817                  | 46.64                              | -10.23               | 3.71  |
| YF-1-7  | 57.47  | 10192.34 | 0.62  | 82.86  | 127.12 | 395.98  | 597.68  | 12.70  | 584.98  | 0.02      | 0.07   | 1.10   | 724                  | 67.74                              | -13.33               | 2.76  |
| YF-1-8  | 70.36  | 14034.04 | 1.72  | 134.57 | 90.15  | 1010.74 | 732.42  | 6.53   | 725.89  | 0.01      | 0.05   | 53.92  | 727                  | 60.84                              | -13.58               | 2.43  |
| YF-1-9  | 78.68  | 11976.84 | 1.59  | 35.52  | 169.40 | 512.28  | 948.64  | 8.85   | 939.79  | 0.01      | 0.05   | 1.14   | 739                  | 27.33                              | -15.90               | -0.18 |
| YF-1-10 | 54.29  | 11308.14 | 1.90  | 16.52  | 367.29 | 586.26  | 717.88  | 26.17  | 691.71  | 0.04      | 0.12   | 153.30 | 747                  | 51.82                              | -13.13               | 2.39  |
| YF-1-11 | 58.23  | 10617.42 | 1.01  | 6.44   | 109.34 | 241.85  | 741.08  | 11.04  | 730.04  | 0.02      | 0.08   | 10.58  | 829                  | 13.09                              | -14.28               | -0.59 |
| YF-1-12 | 81.07  | 10362.52 | 1.39  | 11.63  | 194.89 | 432.22  | 1024.31 | 39.86  | 984.45  | 0.04      | 0.04   | 1.60   | 762                  | 9.52                               | -18.46               | -3.30 |
| YF-1-13 | 39.34  | 8659.89  | 0.67  | 4.11   | 113.99 | 146.74  | 518.25  | 13.76  | 504.49  | 0.03      | 0.17   | 66.59  | 835                  | 12.84                              | -14.10               | -0.53 |
| YF-1-14 | 52.32  | 12087.90 | 2.62  | 16.71  | 251.37 | 639.39  | 609.79  | 16.13  | 593.67  | 0.03      | 0.07   | 65.47  | 707                  | 121.13                             | -12.05               | 4.46  |
| YF-1-15 | 70.66  | 9098.07  | 1.45  | 11.45  | 333.53 | 383.34  | 995.89  | 32.54  | 963.35  | 0.03      | 0.14   | 73.99  | 779                  | 19.98                              | -15.07               | -0.29 |
| YF-1-16 | 155.37 | 12415.23 | 10.59 | 62.78  | 314.93 | 2316.61 | 1570.73 | 17.51  | 1553.22 | 0.01      | 0.61   | 593.83 | 631                  | 338.45                             | -12.67               | 5.97  |
| YF-1-17 | 74.28  | 10547.61 | 1.33  | 66.61  | 243.24 | 339.10  | 1083.88 | 20.48  | 1063.40 | 0.02      | 0.07   | 21.51  | 824                  | 5.81                               | -17.24               | -3.44 |

|         |        |          |      |        |        |        |         |        |         |      |      |        |     |       |        |       |
|---------|--------|----------|------|--------|--------|--------|---------|--------|---------|------|------|--------|-----|-------|--------|-------|
| YF-1-18 | 50.08  | 9593.28  | 1.30 | 8.74   | 201.59 | 318.27 | 660.79  | 17.60  | 643.19  | 0.03 | 0.09 | 94.53  | 783 | 21.99 | -14.51 | 0.17  |
| YF-1-19 | 55.99  | 10570.61 | 2.46 | 15.89  | 370.26 | 577.53 | 724.98  | 44.51  | 680.47  | 0.07 | 0.11 | 4.34   | 770 | 26.83 | -14.43 | 0.55  |
| YF-1-20 | 54.00  | 11324.04 | 2.25 | 20.35  | 187.83 | 819.65 | 787.96  | 34.64  | 753.32  | 0.05 | 0.07 | 1.84   | 680 | 9.69  | -22.75 | -5.50 |
| YF-2-1  | 86.91  | 10918.22 | 1.25 | 12.89  | 245.91 | 441.86 | 1203.99 | 21.53  | 1182.46 | 0.02 | 0.07 | 6.83   | 839 | 4.63  | -17.33 | -3.83 |
| YF-2-2  | 72.19  | 9835.48  | 0.47 | 4.95   | 162.46 | 154.29 | 1093.08 | 32.22  | 1060.87 | 0.03 | 0.15 | 10.04  | 908 | 2.48  | -16.40 | -4.22 |
| YF-2-3  | 62.97  | 10259.09 | 0.59 | 4.22   | 138.30 | 131.64 | 946.41  | 28.61  | 917.80  | 0.03 | 0.19 | 12.96  | 869 | 2.61  | -17.77 | -4.86 |
| YF-2-4  | 105.81 | 11126.23 | 1.12 | 40.30  | 200.42 | 549.56 | 1395.53 | 15.23  | 1380.30 | 0.01 | 0.04 | 10.54  | 741 | 1.96  | -24.25 | -8.59 |
| YF-2-5  | 65.56  | 11718.88 | 1.16 | 9.49   | 210.08 | 331.55 | 972.25  | 35.47  | 936.78  | 0.04 | 0.10 | 2.31   | 856 | 3.23  | -17.68 | -4.53 |
| YF-2-6  | 65.67  | 10206.50 | 1.19 | 12.50  | 108.80 | 244.17 | 792.78  | 12.58  | 780.20  | 0.02 | 0.15 | 147.88 | 755 | 15.19 | -17.20 | -1.86 |
| YF-2-7  | 75.01  | 11895.89 | 1.49 | 12.30  | 123.65 | 479.45 | 1010.72 | 9.72   | 1001.00 | 0.01 | 0.04 | -      | 773 | 9.29  | -17.99 | -3.09 |
| YF-2-8  | 67.85  | 10427.53 | 1.16 | 8.43   | 183.11 | 301.41 | 911.19  | 30.85  | 880.34  | 0.04 | 0.22 | 7.78   | 795 | 18.73 | -14.55 | -0.13 |
| YF-2-9  | 39.88  | 8983.64  | 0.65 | 3.33   | 77.49  | 115.16 | 508.96  | 9.91   | 499.05  | 0.02 | 0.21 | 16.38  | 715 | 23.46 | -17.67 | -1.37 |
| YF-2-10 | 49.34  | 11769.34 | 1.92 | 14.70  | 224.68 | 541.59 | 963.27  | 234.52 | 728.76  | 0.32 | 0.09 | 1.30   | 738 | 1.93  | -24.47 | -8.73 |
| YF-2-11 | 104.59 | 10924.10 | 1.03 | 11.34  | 271.55 | 404.92 | 1428.80 | 26.33  | 1402.47 | 0.02 | 0.04 | 2.85   | 800 | 3.60  | -19.76 | -5.46 |
| YF-2-12 | 44.25  | 11153.53 | 1.26 | 8.99   | 166.24 | 320.56 | 558.16  | 14.76  | 543.39  | 0.03 | 0.11 | 82.02  | 717 | 38.22 | -15.80 | 0.46  |
| YF-2-13 | 122.23 | 11673.85 | 3.27 | 25.08  | 215.37 | 874.41 | 1434.22 | 20.21  | 1414.01 | 0.01 | 0.07 | 8.30   | 714 | 21.25 | -18.06 | -1.74 |
| YF-2-14 | 44.33  | 11689.81 | 1.50 | 9.03   | 146.55 | 331.21 | 553.78  | 20.17  | 533.61  | 0.04 | 0.23 | -      | 768 | 71.22 | -10.91 | 4.10  |
| YF-2-15 | 89.84  | 8073.75  | 1.14 | 300.25 | 341.41 | 493.58 | 1396.21 | 54.95  | 1341.26 | 0.04 | 0.43 | 11.46  | 780 | 3.09  | -21.13 | -6.39 |
| YF-2-16 | 51.69  | 11807.38 | 1.65 | 10.94  | 159.78 | 345.97 | 654.72  | 36.16  | 618.56  | 0.06 | 0.08 | 1.84   | 822 | 9.32  | -15.77 | -1.93 |
| YF-2-17 | 63.97  | 11372.52 | 2.29 | 20.13  | 426.99 | 720.24 | 873.04  | 69.85  | 803.19  | 0.09 | 0.10 | 2.27   | 732 | 16.31 | -18.09 | -2.21 |
| YF-2-18 | 49.90  | 9041.99  | 0.97 | 6.90   | 161.79 | 252.97 | 665.37  | 14.17  | 651.20  | 0.02 | 0.10 | 21.74  | 832 | 7.16  | -16.23 | -2.59 |
| YF-2-19 | 72.04  | 11305.55 | 2.28 | 20.42  | 291.31 | 760.09 | 954.30  | 63.91  | 890.39  | 0.07 | 0.10 | 1.72   | 785 | 12.12 | -16.54 | -1.90 |
| YF-2-20 | 112.28 | 11296.46 | 1.77 | 50.40  | 357.67 | 650.50 | 1427.90 | 20.06  | 1407.84 | 0.01 | 0.05 | 8.09   | 822 | 19.15 | -13.26 | 0.58  |
| YF-2-21 | 86.68  | 11274.94 | 2.25 | 19.62  | 296.66 | 730.02 | 1080.42 | 22.54  | 1057.88 | 0.02 | 0.06 | 4.11   | 741 | 13.04 | -18.43 | -2.76 |

Remarks:  $\text{Eu}/\text{Eu}^* = (\text{Eu}_{\text{sample}}/\text{Eu}_{\text{chondrite}})/[(\text{Sm}_{\text{sample}}/\text{Sm}_{\text{chondrite}}) \times (\text{Gd}_{\text{sample}}/\text{Gd}_{\text{chondrite}})]^{0.5}$ . Zircon Ti thermometer ( $T_{\text{Ti}}$ ) equation according to [37],  $\lg(\text{Ti}) = (5.711 \pm 0.072) - (4800 \pm 86)/T_{(\text{K})} + \lg(\alpha\text{TiO}_2) - \lg(\alpha\text{SiO}_2)$ .  $\alpha\text{SiO}_2$  is the  $\text{SiO}_2$  activity in the system ( $\alpha\text{SiO}_2=1$ ), and  $\alpha\text{TiO}_2$  is the  $\text{TiO}_2$  activity in the system ( $\alpha\text{TiO}_2=0.6$ ).  $\text{Ce}^{4+}/\text{Ce}^{3+}$ ,  $\lg f(\text{O}_2)$ , and FMQ were

calculated using the Geo-fo2 software.

Table S3 LA-ICP-MS U-Pb zircon data of the Yongfeng composite pluton

| No.     | ppm    |         | Ratio of isotope                          |           |                                          |           |                                          |           |                                           |           | Age (Ma)                                 |           |                                          |           | Concordance |
|---------|--------|---------|-------------------------------------------|-----------|------------------------------------------|-----------|------------------------------------------|-----------|-------------------------------------------|-----------|------------------------------------------|-----------|------------------------------------------|-----------|-------------|
|         | Th     | U       | $\frac{^{207}\text{Pb}}{^{206}\text{Pb}}$ | $1\sigma$ | $\frac{^{207}\text{Pb}}{^{235}\text{U}}$ | $1\sigma$ | $\frac{^{206}\text{Pb}}{^{238}\text{U}}$ | $1\sigma$ | $\frac{^{207}\text{Pb}}{^{206}\text{Pb}}$ | $1\sigma$ | $\frac{^{207}\text{Pb}}{^{235}\text{U}}$ | $1\sigma$ | $\frac{^{206}\text{Pb}}{^{238}\text{U}}$ | $1\sigma$ |             |
|         |        |         | $^{206}\text{Pb}$                         |           | $^{235}\text{U}$                         |           | $^{238}\text{U}$                         |           | $^{206}\text{Pb}$                         |           | $^{235}\text{U}$                         |           | $^{238}\text{U}$                         |           |             |
| YF-1-1  | 146.61 | 201.87  | 0.05                                      | 0.00280   | 0.17                                     | 0.00908   | 0.02                                     | 0.00033   | 300                                       | 122       | 161                                      | 8         | 153                                      | 2         | 95%         |
| YF-1-2  | 666.90 | 400.37  | 0.05                                      | 0.00202   | 0.17                                     | 0.00695   | 0.02                                     | 0.00028   | 287                                       | 89        | 163                                      | 6         | 155                                      | 2         | 94%         |
| YF-1-3  | 474.87 | 528.76  | 0.06                                      | 0.00113   | 0.51                                     | 0.01070   | 0.07                                     | 0.00062   | 450                                       | 44        | 420                                      | 7         | 415                                      | 4         | 98%         |
| YF-1-4  | 499.95 | 920.80  | 0.05                                      | 0.00178   | 0.17                                     | 0.00589   | 0.02                                     | 0.00023   | 306                                       | 78        | 158                                      | 5         | 148                                      | 1         | 93%         |
| YF-1-5  | 163.68 | 232.39  | 0.05                                      | 0.00313   | 0.17                                     | 0.00997   | 0.02                                     | 0.00029   | 287                                       | 139       | 157                                      | 9         | 149                                      | 2         | 95%         |
| YF-1-6  | 192.00 | 296.07  | 0.05                                      | 0.00286   | 0.17                                     | 0.00886   | 0.02                                     | 0.00039   | 367                                       | 122       | 163                                      | 8         | 152                                      | 2         | 92%         |
| YF-1-7  | 127.12 | 395.98  | 0.07                                      | 0.00116   | 1.95                                     | 0.03255   | 0.19                                     | 0.00170   | 1040                                      | 31        | 1097                                     | 11        | 1125                                     | 9         | 97%         |
| YF-1-8  | 90.15  | 1010.74 | 0.07                                      | 0.00091   | 1.26                                     | 0.02211   | 0.13                                     | 0.00169   | 909                                       | 60        | 829                                      | 10        | 799                                      | 10        | 96%         |
| YF-1-9  | 169.40 | 512.28  | 0.05                                      | 0.00132   | 0.48                                     | 0.01175   | 0.06                                     | 0.00064   | 387                                       | 56        | 395                                      | 8         | 396                                      | 4         | 99%         |
| YF-1-10 | 367.29 | 586.26  | 0.05                                      | 0.00193   | 0.17                                     | 0.00624   | 0.02                                     | 0.00025   | 220                                       | 89        | 156                                      | 5         | 152                                      | 2         | 97%         |
| YF-1-11 | 109.34 | 241.85  | 0.05                                      | 0.00305   | 0.17                                     | 0.01001   | 0.02                                     | 0.00035   | 276                                       | 103       | 159                                      | 9         | 152                                      | 2         | 94%         |
| YF-1-12 | 194.89 | 432.22  | 0.05                                      | 0.00258   | 0.17                                     | 0.00796   | 0.02                                     | 0.00032   | 324                                       | 111       | 160                                      | 7         | 151                                      | 2         | 93%         |
| YF-1-13 | 113.99 | 146.74  | 0.06                                      | 0.00418   | 0.19                                     | 0.01251   | 0.02                                     | 0.00039   | 683                                       | 144       | 180                                      | 11        | 147                                      | 2         | 79%         |
| YF-1-14 | 251.37 | 639.39  | 0.05                                      | 0.00169   | 0.16                                     | 0.00538   | 0.02                                     | 0.00026   | 161                                       | 80        | 152                                      | 5         | 152                                      | 2         | 99%         |
| YF-1-15 | 333.53 | 383.34  | 0.05                                      | 0.00331   | 0.16                                     | 0.01024   | 0.02                                     | 0.00037   | 120                                       | 152       | 150                                      | 9         | 154                                      | 2         | 97%         |
| YF-1-16 | 314.93 | 2316.61 | 0.05                                      | 0.00087   | 0.18                                     | 0.00330   | 0.03                                     | 0.00018   | 176                                       | 8         | 171                                      | 3         | 170                                      | 1         | 99%         |
| YF-1-17 | 243.24 | 339.10  | 0.07                                      | 0.00135   | 1.61                                     | 0.03597   | 0.16                                     | 0.00169   | 946                                       | 40        | 972                                      | 14        | 980                                      | 9         | 99%         |
| YF-1-18 | 201.59 | 318.27  | 0.05                                      | 0.00235   | 0.16                                     | 0.00707   | 0.02                                     | 0.00029   | 124                                       | 115       | 148                                      | 6         | 151                                      | 2         | 97%         |
| YF-1-19 | 370.26 | 577.53  | 0.05                                      | 0.00202   | 0.15                                     | 0.00664   | 0.02                                     | 0.00025   | 39                                        | 100       | 144                                      | 6         | 151                                      | 2         | 95%         |
| YF-1-20 | 187.83 | 819.65  | 0.05                                      | 0.00177   | 0.16                                     | 0.00600   | 0.02                                     | 0.00022   | 143                                       | 90        | 152                                      | 5         | 153                                      | 1         | 99%         |
| YF-2-1  | 245.91 | 441.86  | 0.06                                      | 0.00289   | 0.19                                     | 0.00945   | 0.02                                     | 0.00037   | 480                                       | 113       | 173                                      | 8         | 152                                      | 2         | 87%         |
| YF-2-2  | 162.46 | 154.29  | 0.05                                      | 0.00362   | 0.18                                     | 0.01147   | 0.02                                     | 0.00043   | 467                                       | 148       | 166                                      | 10        | 151                                      | 3         | 90%         |

|          |        |         |      |         |       |         |      |         |      |     |      |    |      |    |     |
|----------|--------|---------|------|---------|-------|---------|------|---------|------|-----|------|----|------|----|-----|
| YF-2-3   | 138.30 | 131.64  | 0.05 | 0.00485 | 0.17  | 0.01258 | 0.02 | 0.00064 | 394  | 197 | 156  | 11 | 151  | 4  | 96% |
| YF-2-4   | 200.42 | 549.56  | 0.06 | 0.00149 | 0.51  | 0.01404 | 0.07 | 0.00075 | 476  | 57  | 417  | 9  | 407  | 5  | 97% |
| YF-2-5   | 210.08 | 331.55  | 0.05 | 0.00236 | 0.17  | 0.00780 | 0.02 | 0.00033 | 345  | 100 | 162  | 7  | 151  | 2  | 93% |
| YF-2-6   | 108.80 | 244.17  | 0.05 | 0.00241 | 0.30  | 0.01359 | 0.04 | 0.00065 | 198  | 113 | 263  | 11 | 275  | 4  | 95% |
| YF-2-7   | 123.65 | 479.45  | 0.05 | 0.00225 | 0.16  | 0.00684 | 0.02 | 0.00029 | 150  | 107 | 150  | 6  | 151  | 2  | 99% |
| YF-2-8   | 183.11 | 301.41  | 0.05 | 0.00313 | 0.17  | 0.00975 | 0.02 | 0.00038 | 317  | 140 | 160  | 8  | 151  | 2  | 94% |
| YF-2-9   | 77.49  | 115.16  | 0.06 | 0.00607 | 0.18  | 0.01879 | 0.02 | 0.00073 | 417  | 253 | 167  | 16 | 149  | 5  | 88% |
| YF-2-10  | 224.68 | 541.59  | 0.05 | 0.00237 | 0.17  | 0.00759 | 0.02 | 0.00029 | 346  | 100 | 163  | 7  | 151  | 2  | 92% |
| YF-2-11  | 271.55 | 404.92  | 0.05 | 0.00249 | 0.15  | 0.00776 | 0.02 | 0.00030 | 87   | 119 | 144  | 7  | 148  | 2  | 97% |
| YF-2-12  | 166.24 | 320.56  | 0.05 | 0.00317 | 0.16  | 0.01049 | 0.02 | 0.00037 | 154  | 144 | 153  | 9  | 154  | 2  | 99% |
| YF-2-13  | 215.37 | 874.41  | 0.05 | 0.00201 | 0.19  | 0.00694 | 0.03 | 0.00038 | 346  | 85  | 177  | 6  | 165  | 2  | 92% |
| YF-2-14  | 146.55 | 331.21  | 0.05 | 0.00280 | 0.17  | 0.00903 | 0.02 | 0.00033 | 295  | 124 | 161  | 8  | 153  | 2  | 94% |
| YF-2-15  | 341.41 | 493.58  | 0.18 | 0.00237 | 11.56 | 0.16048 | 0.46 | 0.00391 | 2661 | 21  | 2569 | 13 | 2453 | 17 | 95% |
| YF-2-16  | 159.78 | 345.97  | 0.05 | 0.00399 | 0.21  | 0.01563 | 0.03 | 0.00048 | 467  | 168 | 194  | 13 | 177  | 3  | 90% |
| YF-2-17  | 426.99 | 720.24  | 0.05 | 0.00190 | 0.16  | 0.00602 | 0.02 | 0.00026 | 189  | 89  | 152  | 5  | 151  | 2  | 99% |
| YF-2-18  | 161.79 | 252.97  | 0.06 | 0.00474 | 0.17  | 0.01413 | 0.02 | 0.00045 | 454  | 187 | 159  | 12 | 144  | 3  | 89% |
| YF-2-19  | 291.31 | 760.09  | 0.05 | 0.00179 | 0.17  | 0.00603 | 0.02 | 0.00027 | 239  | 81  | 158  | 5  | 153  | 2  | 96% |
| YF-2-20  | 357.67 | 650.50  | 0.05 | 0.00129 | 0.49  | 0.01201 | 0.07 | 0.00076 | 367  | 54  | 407  | 8  | 415  | 5  | 97% |
| YF-2-21  | 296.66 | 730.02  | 0.05 | 0.00206 | 0.17  | 0.00705 | 0.02 | 0.00029 | 287  | 91  | 161  | 6  | 152  | 2  | 94% |
| XGml1-1  | 151.41 | 240.51  | 0.05 | 0.00118 | 0.18  | 0.00748 | 0.02 | 0.00071 | 322  | 52  | 164  | 6  | 153  | 4  | 93% |
| XGml1-2  | 95.16  | 146.49  | 0.05 | 0.00172 | 0.21  | 0.01212 | 0.03 | 0.00127 | 332  | 105 | 190  | 10 | 178  | 8  | 93% |
| XGml1-3  | 291.31 | 978.79  | 0.05 | 0.00032 | 0.17  | 0.00238 | 0.02 | 0.00031 | 287  | 13  | 160  | 2  | 152  | 2  | 94% |
| XGml1-4  | 72.19  | 52.46   | 0.05 | 0.00129 | 0.18  | 0.01131 | 0.03 | 0.00099 | 165  | 66  | 164  | 10 | 164  | 6  | 99% |
| XGml1-5  | 1061.1 | 614.12  | 0.05 | 0.00037 | 0.26  | 0.00254 | 0.03 | 0.00025 | 369  | 17  | 234  | 2  | 221  | 2  | 94% |
| XGml1-6  | 154.86 | 1475.35 | 0.05 | 0.00030 | 0.17  | 0.00188 | 0.02 | 0.00022 | 254  | 47  | 161  | 2  | 155  | 1  | 96% |
| XGml1-7  | 160.66 | 209.86  | 0.07 | 0.00055 | 0.99  | 0.00950 | 0.11 | 0.00084 | 831  | 21  | 701  | 5  | 662  | 5  | 94% |
| XGml1-8  | 301.65 | 363.18  | 0.05 | 0.00075 | 0.24  | 0.00082 | 0.03 | 0.00040 | 309  | 33  | 222  | 1  | 214  | 3  | 96% |
| XGml1-9  | 29.32  | 1250.85 | 0.05 | 0.00019 | 0.24  | 0.00131 | 0.03 | 0.00016 | 256  | 7   | 215  | 1  | 212  | 1  | 98% |
| XGml1-10 | 90.36  | 439.45  | 0.05 | 0.00021 | 0.17  | 0.00162 | 0.02 | 0.00014 | 198  | 9   | 157  | 1  | 155  | 1  | 98% |

|           |        |         |      |         |      |         |      |         |      |    |      |    |      |    |      |
|-----------|--------|---------|------|---------|------|---------|------|---------|------|----|------|----|------|----|------|
| XGml1-11  | 123.46 | 134.60  | 0.16 | 0.00136 | 0.53 | 0.01138 | 0.02 | 0.00035 | 2431 | 14 | 431  | 8  | 155  | 2  | 5%   |
| XGml1-12  | 136.68 | 225.92  | 0.05 | 0.00079 | 0.17 | 0.00290 | 0.02 | 0.00021 | 320  | 33 | 164  | 3  | 153  | 1  | 93%  |
| XGml1-13  | 149.99 | 157.69  | 0.06 | 0.00095 | 0.18 | 0.00404 | 0.02 | 0.00020 | 417  | 39 | 171  | 3  | 154  | 1  | 89%  |
| XGml1-14  | 339.10 | 653.66  | 0.05 | 0.00031 | 0.18 | 0.00286 | 0.02 | 0.00045 | 302  | 18 | 165  | 2  | 156  | 3  | 94%  |
| XGml1-15  | 832.94 | 583.56  | 0.06 | 0.00023 | 1.05 | 0.00544 | 0.12 | 0.00070 | 744  | 7  | 731  | 3  | 731  | 4  | 99%  |
| XGml1-16  | 170.41 | 127.22  | 0.07 | 0.00141 | 0.22 | 0.00207 | 0.02 | 0.00070 | 887  | 43 | 205  | 2  | 151  | 4  | 69%  |
| XGml1-17  | 275.74 | 619.96  | 0.05 | 0.00110 | 0.17 | 0.00387 | 0.02 | 0.00006 | 261  | 48 | 159  | 3  | 152  | 0  | 95%  |
| XGml1-18  | 456.08 | 338.56  | 0.07 | 0.00041 | 1.57 | 0.01621 | 0.15 | 0.00174 | 1044 | 11 | 958  | 6  | 922  | 10 | 96%  |
| XGml1-19  | 235.68 | 490.97  | 0.05 | 0.00094 | 0.18 | 0.00320 | 0.02 | 0.00085 | 372  | 41 | 169  | 3  | 155  | 5  | 91%  |
| XGml1-20  | 204.58 | 378.21  | 0.07 | 0.00044 | 1.01 | 0.03542 | 0.10 | 0.00381 | 1018 | 13 | 707  | 18 | 613  | 22 | 85%  |
| XGls12-1  | 9.51   | 195.20  | 0.06 | 0.00031 | 0.96 | 0.00837 | 0.11 | 0.00081 | 772  | 11 | 682  | 4  | 656  | 5  | 96%  |
| XGls12-2  | 167.22 | 1822.59 | 0.05 | 0.00028 | 0.26 | 0.00182 | 0.04 | 0.00021 | 261  | 8  | 237  | 1  | 235  | 1  | 99%  |
| XGls12-3  | 276.66 | 1010.28 | 0.10 | 0.00440 | 2.18 | 0.06750 | 0.15 | 0.00475 | 1698 | 78 | 1174 | 22 | 915  | 27 | 75%  |
| XGls12-4  | 43.31  | 304.52  | 0.07 | 0.00020 | 1.65 | 0.01001 | 0.17 | 0.00110 | 998  | 10 | 991  | 4  | 990  | 6  | 99%  |
| XGls12-5  | 420.04 | 618.74  | 0.08 | 0.00027 | 2.15 | 0.01117 | 0.20 | 0.00117 | 1183 | 7  | 1164 | 4  | 1157 | 6  | 99%  |
| XGls12-6  | 217.44 | 1127.09 | 0.06 | 0.00030 | 0.58 | 0.00364 | 0.07 | 0.00037 | 478  | 11 | 462  | 2  | 462  | 2  | 99%  |
| XGls12-7  | 1347.7 | 1020.35 | 0.36 | 0.00268 | 3.02 | 0.05306 | 0.06 | 0.00071 | 3769 | 6  | 1413 | 13 | 377  | 4  | -16% |
| XGls12-8  | 171.85 | 703.83  | 0.08 | 0.00087 | 1.91 | 0.02789 | 0.18 | 0.00097 | 1102 | 23 | 1086 | 10 | 1078 | 5  | 99%  |
| XGls12-9  | 250.79 | 265.18  | 0.05 | 0.00130 | 0.26 | 0.00617 | 0.04 | 0.00102 | 332  | 56 | 239  | 5  | 230  | 6  | 96%  |
| XGls12-10 | 391.66 | 300.09  | 0.07 | 0.00040 | 1.63 | 0.01164 | 0.16 | 0.00078 | 1047 | 11 | 983  | 4  | 956  | 4  | 97%  |
| XGls12-11 | 567.27 | 2759.93 | 0.05 | 0.00035 | 0.28 | 0.00255 | 0.04 | 0.00014 | 391  | 8  | 253  | 2  | 239  | 1  | 94%  |
| XGls12-12 | 132.59 | 321.85  | 0.08 | 0.00069 | 1.95 | 0.01545 | 0.18 | 0.00056 | 1117 | 17 | 1098 | 5  | 1090 | 3  | 99%  |
| XGls12-13 | 243.56 | 357.48  | 0.07 | 0.00021 | 1.63 | 0.00514 | 0.16 | 0.00053 | 983  | 1  | 983  | 2  | 983  | 3  | 99%  |
| XGls12-14 | 214.19 | 693.80  | 0.07 | 0.00030 | 1.34 | 0.01574 | 0.14 | 0.00189 | 883  | 9  | 864  | 7  | 860  | 11 | 99%  |
| XGls12-15 | 2478.6 | 2615.25 | 0.05 | 0.00024 | 0.27 | 0.00189 | 0.04 | 0.00019 | 298  | 11 | 239  | 2  | 233  | 1  | 97%  |
| XGls12-16 | 243.32 | 1095.16 | 0.05 | 0.00029 | 0.18 | 0.00125 | 0.03 | 0.00019 | 250  | 13 | 165  | 1  | 159  | 1  | 96%  |
| XGls12-17 | 137.99 | 270.80  | 0.07 | 0.00028 | 1.27 | 0.00694 | 0.14 | 0.00076 | 883  | 8  | 835  | 3  | 817  | 4  | 97%  |
| XGls12-18 | 368.62 | 565.79  | 0.08 | 0.00036 | 2.74 | 0.02856 | 0.24 | 0.00175 | 1298 | 8  | 1339 | 8  | 1364 | 9  | 98%  |
| XGls12-19 | 411.82 | 386.95  | 0.07 | 0.00040 | 1.79 | 0.02766 | 0.18 | 0.00243 | 1035 | 11 | 1044 | 10 | 1048 | 13 | 99%  |

|            |        |         |      |         |      |         |      |         |      |     |      |    |      |    |     |
|------------|--------|---------|------|---------|------|---------|------|---------|------|-----|------|----|------|----|-----|
| XGLs12-20  | 87.38  | 133.77  | 0.13 | 0.00026 | 6.42 | 0.02907 | 0.37 | 0.00164 | 2054 | 3   | 2035 | 4  | 2016 | 8  | 99% |
| XXGyf-1-1  | 224.00 | 344.89  | 0.05 | 0.00079 | 0.17 | 0.01222 | 0.02 | 0.00145 | 298  | 35  | 161  | 11 | 152  | 9  | 94% |
| XXGyf-1-2  | 147.26 | 1166.79 | 0.05 | 0.00020 | 0.39 | 0.00410 | 0.05 | 0.00055 | 409  | -25 | 332  | 3  | 321  | 3  | 96% |
| XXGyf-1-3  | 173.40 | 126.88  | 0.05 | 0.00131 | 0.16 | 0.00722 | 0.02 | 0.00081 | 211  | 61  | 153  | 6  | 150  | 5  | 98% |
| XXGyf-1-4  | 98.74  | 283.10  | 0.05 | 0.00108 | 0.17 | 0.00613 | 0.02 | 0.00062 | 261  | 48  | 159  | 5  | 152  | 4  | 95% |
| XXGyf-1-5  | 110.19 | 120.17  | 0.05 | 0.00205 | 0.16 | 0.00044 | 0.02 | 0.00094 | 280  | 91  | 153  | 0  | 145  | 6  | 94% |
| XXGyf-1-6  | 47.01  | 684.79  | 0.05 | 0.00152 | 0.17 | 0.00344 | 0.02 | 0.00026 | 265  | 69  | 155  | 3  | 148  | 2  | 95% |
| XXGyf-1-7  | 81.50  | 154.40  | 0.12 | 0.00324 | 0.41 | 0.01032 | 0.03 | 0.00026 | 1914 | 49  | 346  | 7  | 160  | 2  | 26% |
| XXGyf-1-8  | 82.71  | 116.37  | 0.05 | 0.00399 | 0.17 | 0.00706 | 0.02 | 0.00085 | 361  | 168 | 162  | 6  | 150  | 5  | 92% |
| XXGyf-1-9  | 176.61 | 288.66  | 0.05 | 0.00044 | 0.16 | 0.00320 | 0.02 | 0.00059 | 232  | 20  | 152  | 3  | 147  | 4  | 96% |
| XXGyf-1-10 | 311.37 | 864.30  | 0.05 | 0.00033 | 0.17 | 0.00187 | 0.02 | 0.00023 | 243  | 12  | 156  | 2  | 151  | 1  | 96% |
| XXGyf-1-11 | 91.69  | 187.70  | 0.05 | 0.00153 | 0.16 | 0.00566 | 0.02 | 0.00027 | 333  | 73  | 153  | 5  | 146  | 2  | 95% |
| XXGyf-1-12 | 126.59 | 158.09  | 0.05 | 0.00098 | 0.17 | 0.00254 | 0.02 | 0.00082 | 233  | 72  | 156  | 2  | 152  | 5  | 97% |
| XXGyf-1-13 | 1249.1 | 5886.80 | 0.05 | 0.00059 | 0.17 | 0.00032 | 0.02 | 0.00028 | 261  | 26  | 157  | 0  | 150  | 2  | 95% |
| XXGyf-1-14 | 134.16 | 276.72  | 0.05 | 0.00096 | 0.17 | 0.00397 | 0.02 | 0.00046 | 365  | 71  | 162  | 3  | 149  | 3  | 91% |
| XXGyf-1-15 | 75.08  | 192.91  | 0.06 | 0.00204 | 0.20 | 0.00370 | 0.02 | 0.00040 | 769  | 67  | 188  | 3  | 146  | 3  | 74% |
| XXGyf-1-16 | 237.41 | 472.57  | 0.05 | 0.00147 | 0.16 | 0.00509 | 0.02 | 0.00080 | 309  | 58  | 154  | 4  | 145  | 5  | 93% |
| XXGyf-1-17 | 161.15 | 146.31  | 0.05 | 0.00369 | 0.16 | 0.01596 | 0.02 | 0.00060 | 211  | 172 | 151  | 14 | 147  | 4  | 97% |
| XXGyf-1-18 | 124.90 | 149.85  | 0.05 | 0.00098 | 0.16 | 0.01459 | 0.02 | 0.00191 | 257  | 43  | 151  | 13 | 144  | 12 | 95% |
| XXGyf-1-19 | 249.05 | 706.89  | 0.05 | 0.00034 | 0.16 | 0.00280 | 0.02 | 0.00041 | 333  | 15  | 153  | 2  | 146  | 3  | 95% |
| XXGyf-1-20 | 6213.7 | 7576.37 | 0.05 | 0.00051 | 0.18 | 0.00252 | 0.02 | 0.00028 | 391  | 20  | 166  | 2  | 151  | 2  | 90% |



Table S4 Major (wt%), trace and rare earth (ppm) element data of the Yongfeng granite

| No.                             | YF-1-1 | YF-1-2 | YF-1-3 | YF-1-4 | YF-1-5 | YF-2-1 | YF-2-2 | YF-2-3 | YF-2-4 | YF-2-5 |
|---------------------------------|--------|--------|--------|--------|--------|--------|--------|--------|--------|--------|
| SiO <sub>2</sub>                | 73.28  | 73.20  | 72.48  | 72.57  | 72.80  | 72.97  | 72.62  | 73.21  | 72.41  | 72.60  |
| Al <sub>2</sub> O <sub>3</sub>  | 12.92  | 13.01  | 13.56  | 13.54  | 13.34  | 13.80  | 13.86  | 13.60  | 13.71  | 13.72  |
| CaO                             | 0.99   | 1.00   | 0.93   | 1.28   | 1.06   | 1.10   | 1.07   | 1.06   | 1.12   | 1.18   |
| TFe <sub>2</sub> O <sub>3</sub> | 2.19   | 1.94   | 2.17   | 2.27   | 2.06   | 2.12   | 2.09   | 2.18   | 2.16   | 2.26   |
| FeO                             | 1.81   | 1.58   | 2.01   | 1.87   | 1.49   | 1.76   | 1.81   | 1.89   | 1.85   | 1.96   |
| K <sub>2</sub> O                | 4.99   | 5.53   | 5.46   | 5.28   | 5.50   | 5.36   | 5.53   | 5.27   | 5.36   | 5.25   |
| MgO                             | 0.47   | 0.41   | 0.44   | 0.49   | 0.44   | 0.42   | 0.44   | 0.46   | 0.43   | 0.46   |
| MnO                             | 0.06   | 0.06   | 0.06   | 0.07   | 0.07   | 0.06   | 0.06   | 0.07   | 0.07   | 0.07   |
| Na <sub>2</sub> O               | 3.44   | 3.55   | 3.31   | 3.11   | 3.64   | 3.17   | 3.09   | 3.12   | 3.11   | 3.12   |
| P <sub>2</sub> O <sub>5</sub>   | 0.15   | 0.16   | 0.15   | 0.14   | 0.16   | 0.15   | 0.16   | 0.17   | 0.16   | 0.16   |
| TiO <sub>2</sub>                | 0.25   | 0.23   | 0.22   | 0.24   | 0.23   | 0.23   | 0.24   | 0.25   | 0.24   | 0.25   |
| LOI                             | 1.03   | 0.93   | 0.96   | 0.94   | 0.93   | 0.66   | 0.49   | 0.60   | 0.54   | 0.67   |
| Li                              | 40.60  | 26.00  | 47.80  | 116.00 | 25.80  | 102.00 | 103.00 | 76.50  | 109.00 | 119.00 |
| Be                              | 7.03   | 5.76   | 8.01   | 7.90   | 8.37   | 8.67   | 8.43   | 7.46   | 9.28   | 11.50  |
| Mn                              | 416.00 | 472.00 | 443.00 | 525.00 | 456.00 | 448.00 | 429.00 | 490.00 | 476.00 | 503.00 |
| Co                              | 2.81   | 2.63   | 2.69   | 2.95   | 2.62   | 2.55   | 2.65   | 2.86   | 2.79   | 2.80   |
| Ni                              | 3.23   | 3.13   | 3.30   | 3.05   | 3.08   | 2.96   | 3.02   | 3.01   | 3.63   | 3.58   |
| Cu                              | 2.93   | 3.39   | 7.18   | 3.60   | 7.84   | 3.62   | 4.36   | 3.36   | 4.08   | 4.24   |
| Zn                              | 57.10  | 59.40  | 51.60  | 56.90  | 67.10  | 51.70  | 54.80  | 55.10  | 53.30  | 54.00  |
| Ga                              | 17.50  | 18.50  | 18.80  | 20.30  | 17.90  | 20.00  | 19.50  | 20.00  | 20.00  | 20.50  |
| Rb                              | 331.00 | 365.00 | 371.00 | 393.00 | 352.00 | 392.00 | 398.00 | 397.00 | 402.00 | 405.00 |

|    |        |        |        |        |        |        |        |        |        |        |
|----|--------|--------|--------|--------|--------|--------|--------|--------|--------|--------|
| Sr | 64.00  | 60.60  | 85.70  | 72.60  | 67.70  | 82.10  | 81.80  | 86.70  | 83.30  | 75.70  |
| Mo | 0.35   | 0.34   | 0.63   | 0.66   | 0.25   | 0.70   | 0.78   | 0.81   | 0.89   | 1.00   |
| Cd | <0.05  | <0.05  | 0.06   | <0.05  | 0.05   | <0.05  | <0.05  | <0.05  | <0.05  | 0.05   |
| In | 0.06   | 0.06   | 0.05   | 0.06   | <0.05  | 0.06   | 0.05   | 0.06   | 0.06   | 0.06   |
| Cs | 8.79   | 7.25   | 11.90  | 16.40  | 7.98   | 18.40  | 18.30  | 18.80  | 19.50  | 21.50  |
| Ba | 262.00 | 296.00 | 279.00 | 302.00 | 268.00 | 281.00 | 300.00 | 268.00 | 276.00 | 244.00 |
| Tl | 1.87   | 2.17   | 1.94   | 2.05   | 2.12   | 2.07   | 2.16   | 2.12   | 2.08   | 2.10   |
| Pb | 32.30  | 36.20  | 37.30  | 36.90  | 34.30  | 39.40  | 40.00  | 37.00  | 37.80  | 37.30  |
| Bi | 0.15   | 0.30   | 0.19   | 0.14   | 0.15   | 0.33   | 0.24   | 0.19   | 0.30   | 0.24   |
| Th | 30.20  | 33.50  | 31.10  | 33.20  | 32.60  | 33.60  | 34.10  | 36.70  | 33.40  | 31.90  |
| U  | 28.50  | 28.50  | 20.50  | 12.30  | 9.53   | 44.90  | 16.30  | 16.40  | 10.40  | 23.80  |
| Nb | 24.70  | 24.90  | 24.50  | 26.50  | 25.70  | 25.10  | 25.00  | 27.60  | 26.20  | 27.70  |
| Ta | 3.67   | 3.70   | 3.66   | 3.62   | 3.69   | 3.50   | 3.70   | 4.11   | 3.69   | 3.71   |
| Zr | 154.00 | 142.00 | 122.00 | 172.00 | 139.00 | 153.00 | 161.00 | 129.00 | 141.00 | 120.00 |
| Hf | 5.30   | 5.07   | 4.35   | 6.01   | 4.92   | 5.20   | 5.83   | 4.64   | 5.25   | 4.18   |
| Ti | 1372   | 1242   | 1192   | 1348   | 1254   | 1209   | 1239   | 1353   | 1291   | 1350   |
| W  | 2.66   | 2.39   | 2.36   | 2.56   | 2.94   | 2.92   | 2.28   | 2.01   | 2.25   | 2.25   |
| As | 1.08   | 1.19   | 1.23   | 1.01   | 0.90   | 1.63   | 1.54   | 1.11   | 1.47   | 1.40   |
| V  | 13.50  | 13.40  | 13.20  | 15.00  | 13.50  | 13.40  | 13.60  | 14.60  | 14.00  | 14.60  |
| La | 38.40  | 41.40  | 38.60  | 42.20  | 41.60  | 41.80  | 42.00  | 45.30  | 40.80  | 39.90  |
| Ce | 82.70  | 89.20  | 82.80  | 91.40  | 89.50  | 89.80  | 92.40  | 97.20  | 91.60  | 88.80  |
| Pr | 9.30   | 10.20  | 9.23   | 10.20  | 10.20  | 10.20  | 10.40  | 11.10  | 10.20  | 9.87   |
| Nd | 34.00  | 37.70  | 31.80  | 36.20  | 37.10  | 37.10  | 37.10  | 40.10  | 36.80  | 35.40  |
| Sm | 7.56   | 8.12   | 7.41   | 8.30   | 8.14   | 8.16   | 8.22   | 9.11   | 8.28   | 8.00   |
| Eu | 0.61   | 0.63   | 0.58   | 0.65   | 0.61   | 0.64   | 0.64   | 0.61   | 0.64   | 0.59   |
| Gd | 5.89   | 6.14   | 5.87   | 7.00   | 6.60   | 6.34   | 6.49   | 7.52   | 6.23   | 6.12   |

|                                      |        |        |        |        |        |        |        |        |        |        |
|--------------------------------------|--------|--------|--------|--------|--------|--------|--------|--------|--------|--------|
| Tb                                   | 0.88   | 0.91   | 0.88   | 1.07   | 0.95   | 0.94   | 0.90   | 1.20   | 0.94   | 0.90   |
| Dy                                   | 4.65   | 4.64   | 4.45   | 6.01   | 4.93   | 4.84   | 4.65   | 6.52   | 4.97   | 4.70   |
| Ho                                   | 0.82   | 0.79   | 0.78   | 1.12   | 0.83   | 0.82   | 0.77   | 1.20   | 0.85   | 0.79   |
| Er                                   | 2.27   | 2.08   | 2.06   | 3.23   | 2.28   | 2.21   | 2.11   | 3.43   | 2.38   | 2.13   |
| Tm                                   | 0.33   | 0.31   | 0.29   | 0.48   | 0.33   | 0.33   | 0.29   | 0.50   | 0.34   | 0.31   |
| Yb                                   | 1.96   | 1.91   | 1.82   | 2.93   | 2.03   | 1.96   | 1.85   | 3.08   | 2.09   | 1.92   |
| Lu                                   | 0.30   | 0.28   | 0.28   | 0.44   | 0.31   | 0.29   | 0.28   | 0.43   | 0.31   | 0.29   |
| Y                                    | 19.40  | 19.70  | 19.30  | 29.20  | 21.10  | 20.40  | 18.90  | 30.40  | 21.10  | 20.20  |
| Sc                                   | 4.47   | 4.39   | 4.07   | 4.57   | 4.33   | 4.43   | 4.24   | 4.45   | 4.39   | 4.43   |
| DI                                   | 90.37  | 91.80  | 90.10  | 88.40  | 91.29  | 89.38  | 89.36  | 89.25  | 89.09  | 88.55  |
| AKI                                  | 0.86   | 0.91   | 0.84   | 0.80   | 0.90   | 0.80   | 0.80   | 0.80   | 0.80   | 0.79   |
| A/CNK                                | 1.00   | 0.95   | 1.04   | 1.03   | 0.96   | 1.06   | 1.06   | 1.07   | 1.06   | 1.06   |
| A/NK                                 | 1.17   | 1.10   | 1.19   | 1.25   | 1.12   | 1.25   | 1.25   | 1.25   | 1.26   | 1.27   |
| K <sub>2</sub> O/Na <sub>2</sub> O   | 1.45   | 1.56   | 1.65   | 1.70   | 1.51   | 1.69   | 1.79   | 1.69   | 1.72   | 1.68   |
| K <sub>2</sub> O+Na <sub>2</sub> O   | 8.43   | 9.08   | 8.77   | 8.39   | 9.14   | 8.53   | 8.62   | 8.39   | 8.47   | 8.37   |
| TFe <sub>2</sub> O <sub>3</sub> /MgO | 4.66   | 4.73   | 4.93   | 4.63   | 4.68   | 5.05   | 4.75   | 4.74   | 5.02   | 4.91   |
| Rb/Sr                                | 5.17   | 6.02   | 4.33   | 5.41   | 5.20   | 4.77   | 4.87   | 4.58   | 4.83   | 5.35   |
| Rb/Ba                                | 1.26   | 1.23   | 1.33   | 1.30   | 1.31   | 1.40   | 1.33   | 1.48   | 1.46   | 1.66   |
| Rb/Nb                                | 13.40  | 14.66  | 15.14  | 14.83  | 13.70  | 15.62  | 15.92  | 14.38  | 15.34  | 14.62  |
| Zr+Nb+Ce+Y                           | 280.80 | 275.80 | 248.60 | 319.10 | 275.30 | 288.30 | 297.30 | 284.20 | 279.90 | 256.70 |
| ΣREE                                 | 189.67 | 204.31 | 186.85 | 211.23 | 205.41 | 205.43 | 208.10 | 227.30 | 206.43 | 199.72 |
| LREE                                 | 172.57 | 187.25 | 170.42 | 188.95 | 187.15 | 187.70 | 190.76 | 203.42 | 188.32 | 182.56 |
| HREE                                 | 17.10  | 17.06  | 16.43  | 22.28  | 18.26  | 17.73  | 17.34  | 23.88  | 18.11  | 17.16  |
| LREE/HREE                            | 10.09  | 10.98  | 10.37  | 8.48   | 10.25  | 10.59  | 11.00  | 8.52   | 10.40  | 10.64  |
| (La/Yb) <sub>N</sub>                 | 14.05  | 15.55  | 15.21  | 10.33  | 14.70  | 15.30  | 16.28  | 10.55  | 14.00  | 14.91  |
| Eu/Eu*                               | 0.28   | 0.27   | 0.27   | 0.26   | 0.25   | 0.27   | 0.27   | 0.23   | 0.27   | 0.26   |

|                      |        |        |        |        |        |        |        |        |        |        |
|----------------------|--------|--------|--------|--------|--------|--------|--------|--------|--------|--------|
| Ce/Ce*               | 1.07   | 1.06   | 1.08   | 1.08   | 1.07   | 1.07   | 1.08   | 1.06   | 1.10   | 1.10   |
| T <sub>Zr</sub> (°C) | 780.71 | 767.48 | 763.16 | 791.68 | 765.71 | 784.59 | 789.22 | 770.92 | 777.28 | 763.70 |

Remarks: Differentiation index (DI)= Qz+Or+Ab+Ne+Lc+Kp (Qz, Or, Ab, Ne, Lc, Kp are the contents of quartz, orthoclase, albite, nepheline, leucite and kalsilite after CIPW standard mineral calculations, respectively). Alkali aluminum index (AKI)=  $[n(\text{Na}_2\text{O})+n(\text{K}_2\text{O})]/[n(\text{Al}_2\text{O}_3)]$ . A/CNK =  $n(\text{Al}_2\text{O}_3)/[n(\text{CaO})+n(\text{Na}_2\text{O})+n(\text{K}_2\text{O})]$ . Eu/Eu\*=  $(\text{Eu}_{\text{sample}}/\text{Eu}_{\text{chondrite}})/[(\text{Sm}_{\text{sample}}/\text{Sm}_{\text{chondrite}}) \times (\text{Gd}_{\text{sample}}/\text{Gd}_{\text{chondrite}})]^{0.5}$ . Zircon saturation temperature was calculated according to [38].  $T_{\text{Zr}} = 12900/[2.95+0.85M+\ln(496000/\text{Zr}_{\text{melt}})]$ ,  $M = \{[n(\text{Na})+n(\text{K})+2n(\text{Ca})]/[n(\text{Al}) \times n(\text{Si})]\}$  (unit: degrees Fahrenheit).

Table S5. The chemical composition of biotite from the Yongfeng granite

| No.                                                              | YF-1-4-<br>1 | YF-1-4-<br>2 | YF-1-4-<br>3 | YF-1-4-<br>4 | YF-1-4-<br>5 | YF-2-1-<br>1 | YF-2-1-<br>3 | YF-2-1-<br>4 | YF-2-1-<br>5 | YF-2-2-<br>1 | YF-2-2-<br>2 | YF-2-2-<br>3 | YF-2-2-<br>4 | YF-2-2-<br>5 |
|------------------------------------------------------------------|--------------|--------------|--------------|--------------|--------------|--------------|--------------|--------------|--------------|--------------|--------------|--------------|--------------|--------------|
| Test results of electron probe (%)                               |              |              |              |              |              |              |              |              |              |              |              |              |              |              |
| SiO <sub>2</sub>                                                 | 34.84        | 34.59        | 34.56        | 34.21        | 35.06        | 34.95        | 35.05        | 34.83        | 35.00        | 35.16        | 34.80        | 34.05        | 34.96        | 34.27        |
| Al <sub>2</sub> O <sub>3</sub>                                   | 18.07        | 18.47        | 19.00        | 18.71        | 18.59        | 19.10        | 18.46        | 18.63        | 18.02        | 18.39        | 18.39        | 18.77        | 18.37        | 18.63        |
| TiO <sub>2</sub>                                                 | 2.93         | 2.88         | 3.01         | 2.99         | 2.29         | 2.72         | 2.14         | 2.06         | 1.97         | 2.34         | 2.30         | 3.20         | 3.26         | 2.75         |
| TFeO                                                             | 22.50        | 22.13        | 22.61        | 22.66        | 21.80        | 22.60        | 22.92        | 23.42        | 22.83        | 22.83        | 22.58        | 22.69        | 21.82        | 22.96        |
| MnO                                                              | 0.50         | 0.50         | 0.55         | 0.47         | 0.48         | 0.52         | 0.49         | 0.52         | 0.52         | 0.47         | 0.53         | 0.45         | 0.50         | 0.45         |
| MgO                                                              | 5.47         | 5.30         | 5.11         | 5.12         | 5.53         | 5.35         | 5.51         | 5.47         | 5.93         | 5.39         | 5.50         | 4.94         | 5.34         | 5.27         |
| CaO                                                              | 0.01         | 0.01         | 0.01         | 0.01         | 0.01         | 0.03         | 0.03         | 0.00         | 0.03         | 0.03         | 0.04         | 0.00         | 0.00         | 0.04         |
| Na <sub>2</sub> O                                                | 0.10         | 0.10         | 0.09         | 0.07         | 0.13         | 0.12         | 0.06         | 0.06         | 0.08         | 0.09         | 0.06         | 0.11         | 0.10         | 0.10         |
| K <sub>2</sub> O                                                 | 10.10        | 10.05        | 10.17        | 10.26        | 10.28        | 10.09        | 10.29        | 10.28        | 10.17        | 10.09        | 10.12        | 10.04        | 10.32        | 10.08        |
| F                                                                | 0.00         | 0.00         | 0.00         | 0.00         | 0.00         | 0.00         | 0.00         | 0.00         | 0.00         | 0.00         | 0.00         | 0.00         | 0.00         | 0.00         |
| Cl                                                               | 0.03         | 0.03         | 0.03         | 0.04         | 0.05         | 0.03         | 0.02         | 0.04         | 0.02         | 0.03         | 0.03         | 0.06         | 0.03         | 0.03         |
| Total                                                            | 94.55        | 94.06        | 95.14        | 94.55        | 94.22        | 95.58        | 95.00        | 95.31        | 94.57        | 94.85        | 94.48        | 94.35        | 94.71        | 94.66        |
| The number of cations calculated on the basis of 22 oxygen atoms |              |              |              |              |              |              |              |              |              |              |              |              |              |              |
| Si                                                               | 5.43         | 5.40         | 5.35         | 5.34         | 5.46         | 5.38         | 5.44         | 5.41         | 5.46         | 5.46         | 5.43         | 5.33         | 5.42         | 5.35         |
| Al <sup>(IV)</sup>                                               | 2.57         | 2.60         | 2.65         | 2.66         | 2.54         | 2.62         | 2.56         | 2.59         | 2.54         | 2.54         | 2.57         | 2.67         | 2.58         | 2.65         |

|                      |        |        |        |        |        |        |        |        |        |        |        |        |        |        |
|----------------------|--------|--------|--------|--------|--------|--------|--------|--------|--------|--------|--------|--------|--------|--------|
| Al <sup>(VI)</sup>   | 0.74   | 0.81   | 0.82   | 0.79   | 0.87   | 0.84   | 0.82   | 0.82   | 0.78   | 0.82   | 0.82   | 0.79   | 0.78   | 0.78   |
| Ti                   | 0.34   | 0.34   | 0.35   | 0.35   | 0.27   | 0.32   | 0.25   | 0.24   | 0.23   | 0.27   | 0.27   | 0.38   | 0.38   | 0.32   |
| Fe <sup>3+</sup>     | 0.41   | 0.41   | 0.41   | 0.40   | 0.39   | 0.41   | 0.39   | 0.37   | 0.37   | 0.41   | 0.40   | 0.41   | 0.41   | 0.40   |
| Mn                   | 0.07   | 0.07   | 0.07   | 0.06   | 0.06   | 0.07   | 0.06   | 0.07   | 0.07   | 0.06   | 0.07   | 0.06   | 0.06   | 0.06   |
| Mg                   | 1.27   | 1.23   | 1.18   | 1.19   | 1.28   | 1.23   | 1.28   | 1.27   | 1.38   | 1.25   | 1.28   | 1.15   | 1.23   | 1.23   |
| Fe <sup>2+</sup>     | 2.52   | 2.48   | 2.52   | 2.56   | 2.45   | 2.50   | 2.59   | 2.67   | 2.61   | 2.56   | 2.55   | 2.56   | 2.42   | 2.60   |
| Na                   | 0.03   | 0.03   | 0.03   | 0.02   | 0.04   | 0.04   | 0.02   | 0.02   | 0.02   | 0.03   | 0.02   | 0.03   | 0.03   | 0.03   |
| K                    | 2.01   | 2.00   | 2.01   | 2.04   | 2.04   | 1.98   | 2.04   | 2.04   | 2.02   | 2.00   | 2.02   | 2.00   | 2.04   | 2.01   |
| Fe/(Fe+Mg)           | 0.70   | 0.70   | 0.71   | 0.71   | 0.69   | 0.70   | 0.70   | 0.71   | 0.68   | 0.70   | 0.70   | 0.72   | 0.70   | 0.71   |
| Mg/(Fe+Mg)           | 0.30   | 0.30   | 0.29   | 0.29   | 0.31   | 0.30   | 0.30   | 0.29   | 0.32   | 0.30   | 0.30   | 0.28   | 0.30   | 0.29   |
| TFeO/(TFeO+MgO)      | 0.80   | 0.81   | 0.82   | 0.82   | 0.80   | 0.81   | 0.81   | 0.81   | 0.79   | 0.81   | 0.80   | 0.82   | 0.80   | 0.81   |
| lgf(O <sub>2</sub> ) | -18.17 | -18.24 | -18.09 | -18.08 | -19.54 | -18.62 | -20.03 | -20.33 | -20.56 | -19.48 | -19.53 | -17.75 | -17.65 | -18.51 |
| T <sub>li</sub> (°C) | 656    | 653    | 658    | 658    | 614    | 641    | 600    | 591    | 585    | 616    | 614    | 669    | 672    | 645    |
| P (kb)               | 3.85   | 4.10   | 3.97   | 4.24   | 4.14   | 3.97   | 3.71   | 3.80   | 3.84   | 3.66   | 3.73   | 3.96   | 3.64   | 3.86   |
| H (km)               | 14.00  | 14.93  | 14.45  | 15.41  | 15.06  | 14.42  | 13.49  | 13.83  | 13.97  | 13.33  | 13.55  | 14.39  | 13.23  | 14.04  |

(continued)

| No.                                | YF-2-5-1 | YF-2-5-2 | YF-2-5-3 | YF-2-5-4 | YF-2-5-5 | YF-2-4-1 | YF-2-4-2 | YF-2-4-3 | YF-2-4-4 | YF-2-4-5 | YF-2-3-1 | YF-2-3-2 | YF-2-3-3 | YF-2-3-4 |
|------------------------------------|----------|----------|----------|----------|----------|----------|----------|----------|----------|----------|----------|----------|----------|----------|
| Test results of electron probe (%) |          |          |          |          |          |          |          |          |          |          |          |          |          |          |
| SiO <sub>2</sub>                   | 34.30    | 34.11    | 34.46    | 34.47    | 34.64    | 35.11    | 34.60    | 34.69    | 34.59    | 34.11    | 34.33    | 34.52    | 34.70    | 34.78    |
| Al <sub>2</sub> O <sub>3</sub>     | 18.47    | 18.15    | 18.81    | 19.04    | 18.80    | 19.05    | 19.04    | 19.12    | 19.26    | 18.71    | 18.49    | 18.63    | 19.03    | 18.95    |

|                                                                  |        |        |        |        |        |        |        |        |        |        |        |        |        |        |
|------------------------------------------------------------------|--------|--------|--------|--------|--------|--------|--------|--------|--------|--------|--------|--------|--------|--------|
| TiO <sub>2</sub>                                                 | 3.24   | 2.52   | 2.44   | 2.24   | 2.86   | 3.14   | 2.95   | 2.10   | 2.38   | 2.03   | 3.05   | 3.15   | 2.65   | 3.44   |
| TFeO                                                             | 22.37  | 23.77  | 22.95  | 22.88  | 22.59  | 21.43  | 22.01  | 22.47  | 22.38  | 23.91  | 22.95  | 22.74  | 22.40  | 22.48  |
| MnO                                                              | 0.51   | 0.54   | 0.51   | 0.49   | 0.58   | 0.43   | 0.56   | 0.55   | 0.55   | 0.55   | 0.51   | 0.49   | 0.50   | 0.49   |
| MgO                                                              | 4.96   | 5.12   | 5.18   | 4.91   | 5.19   | 4.93   | 5.08   | 5.24   | 4.91   | 5.53   | 5.16   | 5.32   | 5.03   | 5.06   |
| CaO                                                              | 0.03   | 0.01   | 0.01   | 0.02   | 0.03   | 0.03   | 0.03   | 0.02   | 0.02   | 0.01   | 0.03   | 0.02   | 0.00   | 0.00   |
| Na <sub>2</sub> O                                                | 0.09   | 0.08   | 0.09   | 0.15   | 0.07   | 0.08   | 0.11   | 0.09   | 0.09   | 0.05   | 0.15   | 0.13   | 0.17   | 0.15   |
| K <sub>2</sub> O                                                 | 10.07  | 9.91   | 10.19  | 10.16  | 10.21  | 10.01  | 10.05  | 10.11  | 10.17  | 9.19   | 10.06  | 10.15  | 10.04  | 10.11  |
| F                                                                | 0.00   | 0.00   | 0.00   | 0.00   | 0.00   | 0.00   | 0.00   | 0.00   | 0.00   | 0.45   | 0.00   | 0.00   | 0.00   | 0.00   |
| Cl                                                               | 0.03   | 0.03   | 0.02   | 0.03   | 0.04   | 0.03   | 0.03   | 0.03   | 0.04   | 0.02   | 0.03   | 0.04   | 0.03   | 0.04   |
| Total                                                            | 94.07  | 94.25  | 94.68  | 94.40  | 95.04  | 94.24  | 94.49  | 94.42  | 94.40  | 94.63  | 94.80  | 95.20  | 94.55  | 95.53  |
| The number of cations calculated on the basis of 22 oxygen atoms |        |        |        |        |        |        |        |        |        |        |        |        |        |        |
| Si                                                               | 5.37   | 5.37   | 5.38   | 5.39   | 5.37   | 5.43   | 5.38   | 5.40   | 5.39   | 5.38   | 5.35   | 5.35   | 5.39   | 5.35   |
| Al <sup>(IV)</sup>                                               | 2.63   | 2.63   | 2.62   | 2.61   | 2.63   | 2.57   | 2.62   | 2.60   | 2.61   | 2.62   | 2.65   | 2.65   | 2.61   | 2.65   |
| Al <sup>(VI)</sup>                                               | 0.78   | 0.74   | 0.83   | 0.90   | 0.81   | 0.91   | 0.86   | 0.92   | 0.93   | 0.85   | 0.75   | 0.75   | 0.88   | 0.79   |
| Ti                                                               | 0.38   | 0.30   | 0.29   | 0.26   | 0.33   | 0.37   | 0.34   | 0.25   | 0.28   | 0.24   | 0.36   | 0.37   | 0.31   | 0.40   |
| Fe <sup>3+</sup>                                                 | 0.42   | 0.39   | 0.39   | 0.39   | 0.41   | 0.44   | 0.42   | 0.40   | 0.41   | 0.42   | 0.40   | 0.40   | 0.41   | 0.42   |
| Mn                                                               | 0.07   | 0.07   | 0.07   | 0.07   | 0.08   | 0.06   | 0.07   | 0.07   | 0.07   | 0.07   | 0.07   | 0.07   | 0.06   | 0.07   |
| Mg                                                               | 1.16   | 1.20   | 1.21   | 1.14   | 1.20   | 1.14   | 1.18   | 1.22   | 1.14   | 1.30   | 1.20   | 1.23   | 1.17   | 1.16   |
| Fe <sup>2+</sup>                                                 | 2.51   | 2.74   | 2.60   | 2.60   | 2.52   | 2.33   | 2.44   | 2.53   | 2.51   | 2.74   | 2.59   | 2.54   | 2.50   | 2.47   |
| Na                                                               | 0.03   | 0.02   | 0.03   | 0.05   | 0.02   | 0.02   | 0.03   | 0.03   | 0.03   | 0.02   | 0.04   | 0.04   | 0.05   | 0.05   |
| K                                                                | 2.01   | 1.99   | 2.03   | 2.03   | 2.02   | 1.98   | 1.99   | 2.01   | 2.02   | 1.85   | 2.00   | 2.01   | 1.99   | 1.99   |
| Fe/(Fe+Mg)                                                       | 0.72   | 0.72   | 0.71   | 0.72   | 0.71   | 0.71   | 0.71   | 0.71   | 0.72   | 0.71   | 0.71   | 0.71   | 0.71   | 0.71   |
| Mg/(Fe+Mg)                                                       | 0.28   | 0.28   | 0.29   | 0.28   | 0.29   | 0.29   | 0.29   | 0.29   | 0.28   | 0.29   | 0.29   | 0.29   | 0.29   | 0.29   |
| TFeO/(TFeO+MgO)                                                  | 0.82   | 0.82   | 0.82   | 0.82   | 0.81   | 0.81   | 0.81   | 0.81   | 0.82   | 0.81   | 0.82   | 0.81   | 0.82   | 0.82   |
| lgf(O <sub>2</sub> )                                             | -17.68 | -18.98 | -19.20 | -19.77 | -18.32 | -17.87 | -18.16 | -20.17 | -19.38 | -20.35 | -17.98 | -17.85 | -18.75 | -17.48 |
| T <sub>Ti</sub> (°C)                                             | 671    | 631    | 624    | 607    | 651    | 665    | 656    | 596    | 619    | 591    | 662    | 666    | 638    | 678    |

|        |       |       |       |       |       |       |       |       |       |       |       |       |       |       |
|--------|-------|-------|-------|-------|-------|-------|-------|-------|-------|-------|-------|-------|-------|-------|
| P (kb) | 3.80  | 3.68  | 3.95  | 4.10  | 3.88  | 4.00  | 4.36  | 4.11  | 4.19  | 4.00  | 3.76  | 3.78  | 4.03  | 3.88  |
| H (km) | 13.81 | 13.37 | 14.35 | 14.91 | 14.12 | 14.54 | 15.86 | 14.94 | 15.23 | 14.55 | 13.68 | 13.75 | 14.65 | 14.13 |

Remarks: The crystallization temperature ( $T_{Ti}$ ) of biotite was calculated according to the formula:  $T = \{[\ln(Ti) + 2.3594 + 1.7283 \times (X_{Mg})^3] / (4.6482 \times 10^{-9})\}^{0.333}$ ,  $X_{Mg} = Mg / (Mg + TFe)$  ([92]). The  $\lg f(O_2)$  was calculated according to the formula:  $\lg f(O_2) = 10.9 - 27000 / T_{(K)}$ , ( $T_{(K)}$  is the crystallization temperature of biotite, [46]).
